# Supplementary material for: Association Between Hypocholesterolemia and Mortality in Critically Ill Patients With Sepsis: A Systematic Review and Meta-Analysis
Source: PubMed Central journal article supplement — Crit Care Explor. 2023 Feb 1;5(2):e0860. doi: 10.1097/CCE.0000000000000860 (PMC9894355; doi:10.1097/cce.0000000000000860), 2023-02-01
Supplement: cc9-5-e0860-s001.pdf [file cc9-5-e0860-s001.pdf]

**Association between hypocholesterolemia and mortality in critically ill patients  
with sepsis: A systematic review and meta-analysis.**

**Supplemental material**

## Table of contents

*Supplemental Table 1*.....p3

*Supplemental Figure 1*.....p5

**Supplemental Table 1. Characteristics of included studies**

| Study                              | Survival      | Patients | Male n (%)   | Age (y, mean/SD) | Origin of sepsis n (%) |          |           |                      | Statins n (%)      |
|------------------------------------|---------------|----------|--------------|------------------|------------------------|----------|-----------|----------------------|--------------------|
|                                    |               |          |              |                  | pulmonary              | urinary  | abdominal | other/not stratified |                    |
| Barlage (2009) (47)                | survivors     | 104      | 72 (69.2)    | 56.5 ± 7.49      |                        |          |           | 104 (100)            | not reported       |
|                                    | non-survivors | 47       | 36 (76.6)    | 59.25 ± 8.37     |                        |          |           | 47 (100)             | not reported       |
| Berbee (2008) (48)                 | survivors     | 9        | 4 (44.4)     | 61.5 ± 5.77      | 7 (77.8)               |          |           | 2 (22.2)             | not reported       |
|                                    | non-survivors | 8        | 5 (62.5)     | 68.23 ± 1.09     | 5 (62.5)               | 1 (12.5) |           | 2 (25)               | not reported       |
| Cetinkaya (2014) (49)              | survivors     | 26       | not reported | 68.19 ± 13.88    |                        |          |           | 26 (100)             | prior use excluded |
|                                    | non-survivors | 53       | not reported | 72.97 ± 9.31     |                        |          |           | 53 (100)             | prior use excluded |
| Delirrad (2020) (50)               | survivors     | 32       | 16 (50)      | 67.62 ± 11.24    |                        |          |           | 32 (100)             | prior use excluded |
|                                    | non-survivors | 56       | 32 (57.1)    | 73.70 ± 10.43    |                        |          |           | 56 (100)             | prior use excluded |
| Guirgis (2018, 2020, 2021) (13-15) | survivors     | 200      | 108 (54)     | 59.71 ± 15.57    | 57 (28.5)              | 50 (25)  | 39 (19.5) | 54 (27)              | 64 (32)            |
|                                    | non-survivors | 42       | 22 (52.4)    | 65.5 ± 12.89     | 17 (40.5)              | 8 (19)   | 10 (23.8) | 7 (16.7)             | 15 (36)            |
| Khaliq (2020) (56)                 | survivors     | 12       | 9 (75)       | 68 ± 16          | 7 (58)                 |          |           | 5 (42)               | 2 (17)             |
|                                    | non-survivors | 8        | 7 (88)       | 68 ± 13          | 5 (63)                 |          |           | 3 (37)               | 3 (38)             |
| Lee (2015) (7)                     | survivors     | 65       | 42 (64.6)    | 63.0 ± 16.6      | 45 (69.2)              | 5 (7.7)  | 11 (16.9) | 4 (6.1)              | prior use excluded |
|                                    | non-survivors | 52       | 31 (59.6)    | 62.3 ± 15.9      | 49 (94.2)              |          | 3 (5.8)   |                      | prior use excluded |
| Lekkou (2014) (51)                 | survivors     | 28       | 15 (53.6)    | 64.8 ± 3.2       |                        |          |           | 28 (100)             | not reported       |
|                                    | non-survivors | 22       | 12 (54.5)    | 66.2 ± 6.5       |                        |          |           | 22 (100)             | not reported       |

|                             |               |     |              |               |           |           |           |           |              |
|-----------------------------|---------------|-----|--------------|---------------|-----------|-----------|-----------|-----------|--------------|
| Levels (2007) (52)          | survivors     | 15  | not reported | 60 ± 3        | 15 (100)  |           |           |           | not reported |
|                             | non-survivors | 11  | not reported | 60 ± 4        | 11 (100)  |           |           |           | not reported |
| Memis (2007) (53)           | survivors     | 55  | not reported | 41.7 ± 10.3   | 37 (66.1) | 12 (21.4) | 6 (10.7)  | 1 (1.8)   | not reported |
|                             | non-survivors | 41  | not reported | 67.9 ± 8.8    | 34 (82.9) | 4 (9.8)   | 2 (4.9)   | 1 (2.4)   | not reported |
| Sharma (2017, 2019) (16,17) | survivors     | 15  | 10 (66.6)    | 61.07 ± 16.07 | 15 (100)  |           |           |           | not reported |
|                             | non-survivors | 16  | 12 (75)      | 64.88 ± 13.29 | 16 (100)  |           |           |           | not reported |
| Tanaka (2017) (54)          | survivors     | 40  | not reported | not reported  | 40 (100)  |           |           |           | not reported |
|                             | non-survivors | 10  | not reported | not reported  | 10 (100)  |           |           |           | not reported |
| Tanaka (2019) (18)          | survivors     | 13  | 11 (84.6)    | 67.2 ± 11.96  | 4 (30.8)  | 8 (61.6)  |           | 1 (7.6)   | 2 (15)       |
|                             | non-survivors | 7   | 6 (85.7)     | 70.29 ± 9.6   | 1 (14.2)  | 3 (42.9)  |           | 3 (42.9)  | 1 (14)       |
| Tanaka (2021) (19)          | survivors     | 170 | 89 (52.4)    | 60.67 ± 16.4  | 22 (12.9) | 33 (19.4) | 72 (42.4) | 43 (25.3) | 58 (34)      |
|                             | non-survivors | 35  | 19 (54.3)    | 64.63 ± 13.64 | 7 (20)    | 2 (5.7)   | 15 (42.9) | 11 (31.4) | 5 (14)       |
| Yamano (2016) (55)          | survivors     | 72  | 42 (58.3)    | 62 ± 19       | 16 (22.2) | 1 (1.4)   | 14 (19.4) | 41 (57)   | not reported |
|                             | non-survivors | 19  | 14 (73.7)    | 68 ± 13       | 8 (42.1)  | 3 (15.8)  |           | 8 (42.1)  | not reported |

Study, survival, patient number, gender, age, origin of sepsis and statin use for all included 18 observational studies

## Supplemental Figure 1:

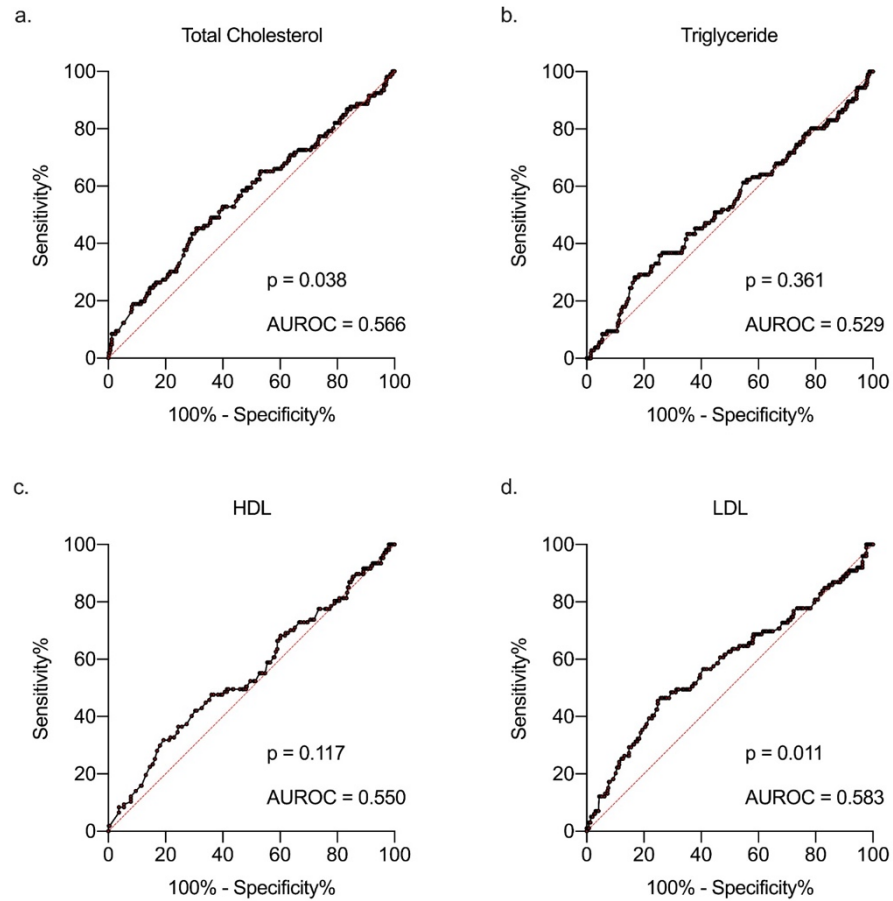

Receiver operating characteristic curves showing association between admission cholesterol and triglyceride levels and survival combined for studies where individual patient parameters were available and provided by contacted corresponding authors.
